# Supplementary material for: Association of the serum microRNA-29 family with cognitive impairment in Parkinson's disease
Source: PubMed Central journal article supplement (PMC7377865; doi:10.18632/aging.103458), 2020-07-09
Supplement: aging-12-103458-s001..pdf [file aging-12-103458-s001..pdf]

## SUPPLEMENTARY TABLE

Supplementary Table 1. Cognitive profile of healthy controls.

| <b>Cognitive test</b>               | <b>Number(n)</b> | <b>Mean</b> | <b>SD</b> |
|-------------------------------------|------------------|-------------|-----------|
| <b>MMSE</b>                         | 93.00            | 27.85       | 1.87      |
| <b>Attention and working memory</b> |                  |             |           |
| SDMT                                | 97.00            | 34.78       | 15.20     |
| TMT-A (s)                           | 97.00            | 48.71       | 28.24     |
| <b>Executive function</b>           |                  |             |           |
| CWT-C time (s)                      | 99.00            | 77.87       | 21.00     |
| CWT-C right                         | 99.00            | 46.80       | 3.54      |
| TMT-B (s)                           | 97.00            | 121.37      | 64.24     |
| <b>Language</b>                     |                  |             |           |
| BNT                                 | 100.00           | 24.82       | 3.22      |
| AFT                                 | 97.00            | 18.02       | 4.35      |
| <b>Memory</b>                       |                  |             |           |
| AVLT-delay recall                   | 100.00           | 5.93        | 1.41      |
| AVLT-T                              | 100.00           | 29.54       | 6.21      |
| CFT-delay recall                    | 100.00           | 16.44       | 5.52      |
| <b>Visuospatial function</b>        |                  |             |           |
| CFT                                 | 100.00           | 33.51       | 3.25      |
| CDT                                 | 100.00           | 25.81       | 6.31      |

Abbreviations: MMSE, Mini Mental State Examination; SDMT, Symbol Digit Modality Test; TMT, Trail Making Test; CWT, Stroop Color-Word Test; BNT, Boston Naming Test; AFT, Animal Fluency Test; AVLT, Auditory Verbal Learning Test; CFT, the Rey-Osterrieth Complex Figure Test; CDT, Clock Drawing Test.
